# Supplementary material for: Characterization of the Desiccation Tolerance of Cronobacter sakazakii Strains
Source: Front Microbiol. 2018 Nov 27;9:2867. doi: 10.3389/fmicb.2018.02867 (PMC6278591; doi:10.3389/fmicb.2018.02867)
Supplement: Supplementary file 1 [file Table_1.xlsx]

## Sheet: Sheet1
Supplementary material
Supplementary Table 1 The distribution and percentage of sequence types of 45 test strains.
Strain	Sequence Type	Clonal complex	Number of strains in the same sequence type	Proportion of strains
ATCC BAA-894	1	1	3	0.071
ENS 70817	1	1
SAKA 10319	1	1
ATCC 12868	3	3	1	0.024
ATCC 29004	4	4	9	0.214
ENS 70819	4	4
ENS 71106	4	4
SAKA 80417-1	4	4
SAKA 81013-2	4	4
SAKA 90225	4	4
SAKA 90303	4	4
SAKA 90309	4	4
SAKA 90309-1	4	4
ENS 70510	8	8	2	0.048
ENS 90930	8	8
SAKA 80704	14	1	2	0.048
SAKA 80721	14	1
SAKA 81021	21	21	1	0.024
SAKA 110609-3	23	23	1	0.024
SAKA 100531	31	31	1	0.024
SAKA 70115-2	42	42	4	0.095
SAKA 91218	42	42
SAKA 10208	42	42
SAKA 10128-91	42	42
ENS 60309-1	58	—	4	0.089
SAKA 81013-1	58	—
SAKA 81013-5	58	—
SAKA 81104	58	—
ENS 71123	103	—	1	0.024
SAKA 90807	136	—	1	0.024
SAKA 80222	145	—	1	0.024
SAKA 80408	184	142	2	0.042
SAKA 81111	184	142
ENS 70208	199	—	2	0.044
SAKA 10119	199	—
SAKA 90310-1	264	264	1	0.024
SAKA 80220A	327	—	2	0.048
SAKA 80221	327	—
SAKA 90505	375	73	1	0.024
SAKA 90109	NF	—	1	0.024
SAKA 90814	NF	—	1	0.024
SAKA 91021	NF	—	1	0.024
Supplementary Table 2 Quantitative real-time PCR analysis of the expression levels of 10 genes associated with desiccation tolerance in four strains in comparison with reference gene 16S rRNA.
Gene	Relative expression of mRNA of the test strains (16S rRNA as reference)
	ENS 70819	SAKA 90814	ENS 71106	SAKA 110609-3
proP (ESA_03328)	0.51 ± 0.12	0.69 ± 0.37	2.77 ± 0.31	7.78 ± 0.35
proP (ESA_02131)	0.31 ± 0.19	3.23 ± 0.29	3.53 ± 0.18	16.11 ± 0.18
opuCC (ESA_01738)	1.01 ± 0.16	1.13 ± 0.28	2.04 ± 0.31	3.99 ± 0.32
opuCC (ESA_01740)	0.74 ± 0.22	4.38 ± 0.24	5.44 ± 0.26	8.42 ± 0.31
otsA (ESA_01335)	0.41 ± 0.23	0.97 ± 0.12	1.55 ± 0.34	2.80 ± 0.23
otsB (ESA_01334)	0.40 ± 0.20	0.50 ± 0.29	1.19 ± 0.35	12.67 ± 0.69
kdpA (ESA_02641)	0.78 ± 0.10	2.82 ± 0.28	3.13 ± 0.62	6.31 ± 0.76
kefB (ESA_04389)	0.56 ± 0.12	1.41 ± 0.38	1.41 ± 0.10	5.76 ± 0.12
betA (ESA_02049)	0.85 ±0.17	1.25 ±0.22	4.56 ±0.23	6.77 ±0.25
betB (ESA_02048)	0.97 ±0.25	1.51 ±0.15	1.96 ±0.20	5.02 ±0.30
